# Supplementary material for: Inflammation-based lung adenocarcinoma molecular subtype identification and construction of an inflammation-related signature with bulk and single-cell RNA-seq data
Source: publisher site journal article supplement (doi:10.18632/aging.205840), 2024-05-20
Supplement: Supplementary file [file aging-v16i10-205840-supplementary-material-SD1.pdf]

# SUPPLEMENTARY FIGURES

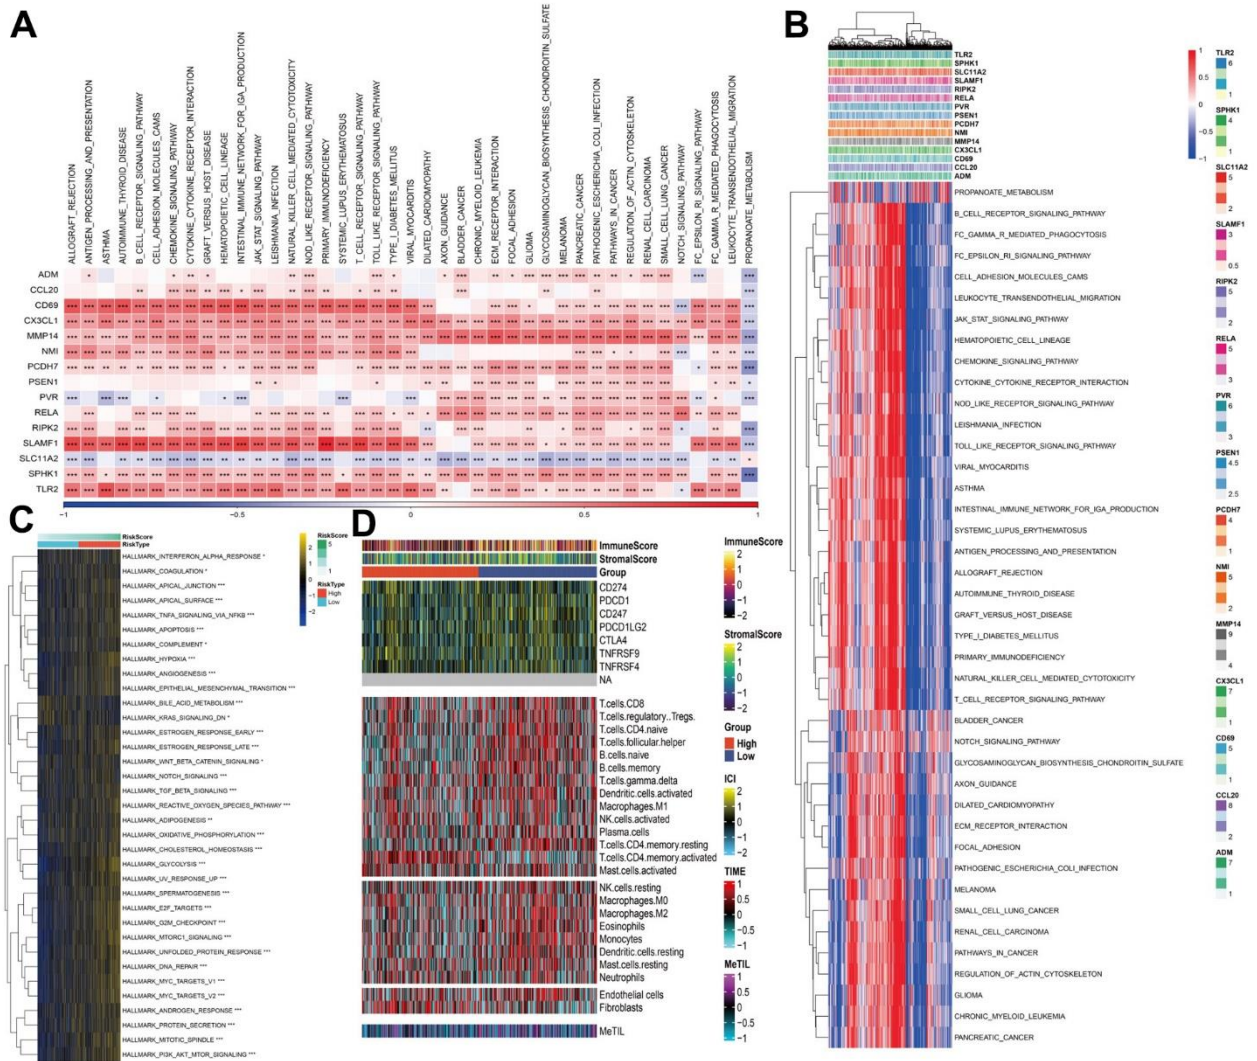

**Supplementary Figure 1. Analysis of pathway enrichment and immune cell infiltration of the risk model. (A, B)** The correlations between hub genes and 41 classical pathways. **(C)** The correlations between the two risk groups and hallmark pathways identified by GSVA. **(D)** Heatmap of immune cell expression in the TME in LUAD analyzed using multialgorithm, including existing data from TIMER and MCP-counter.

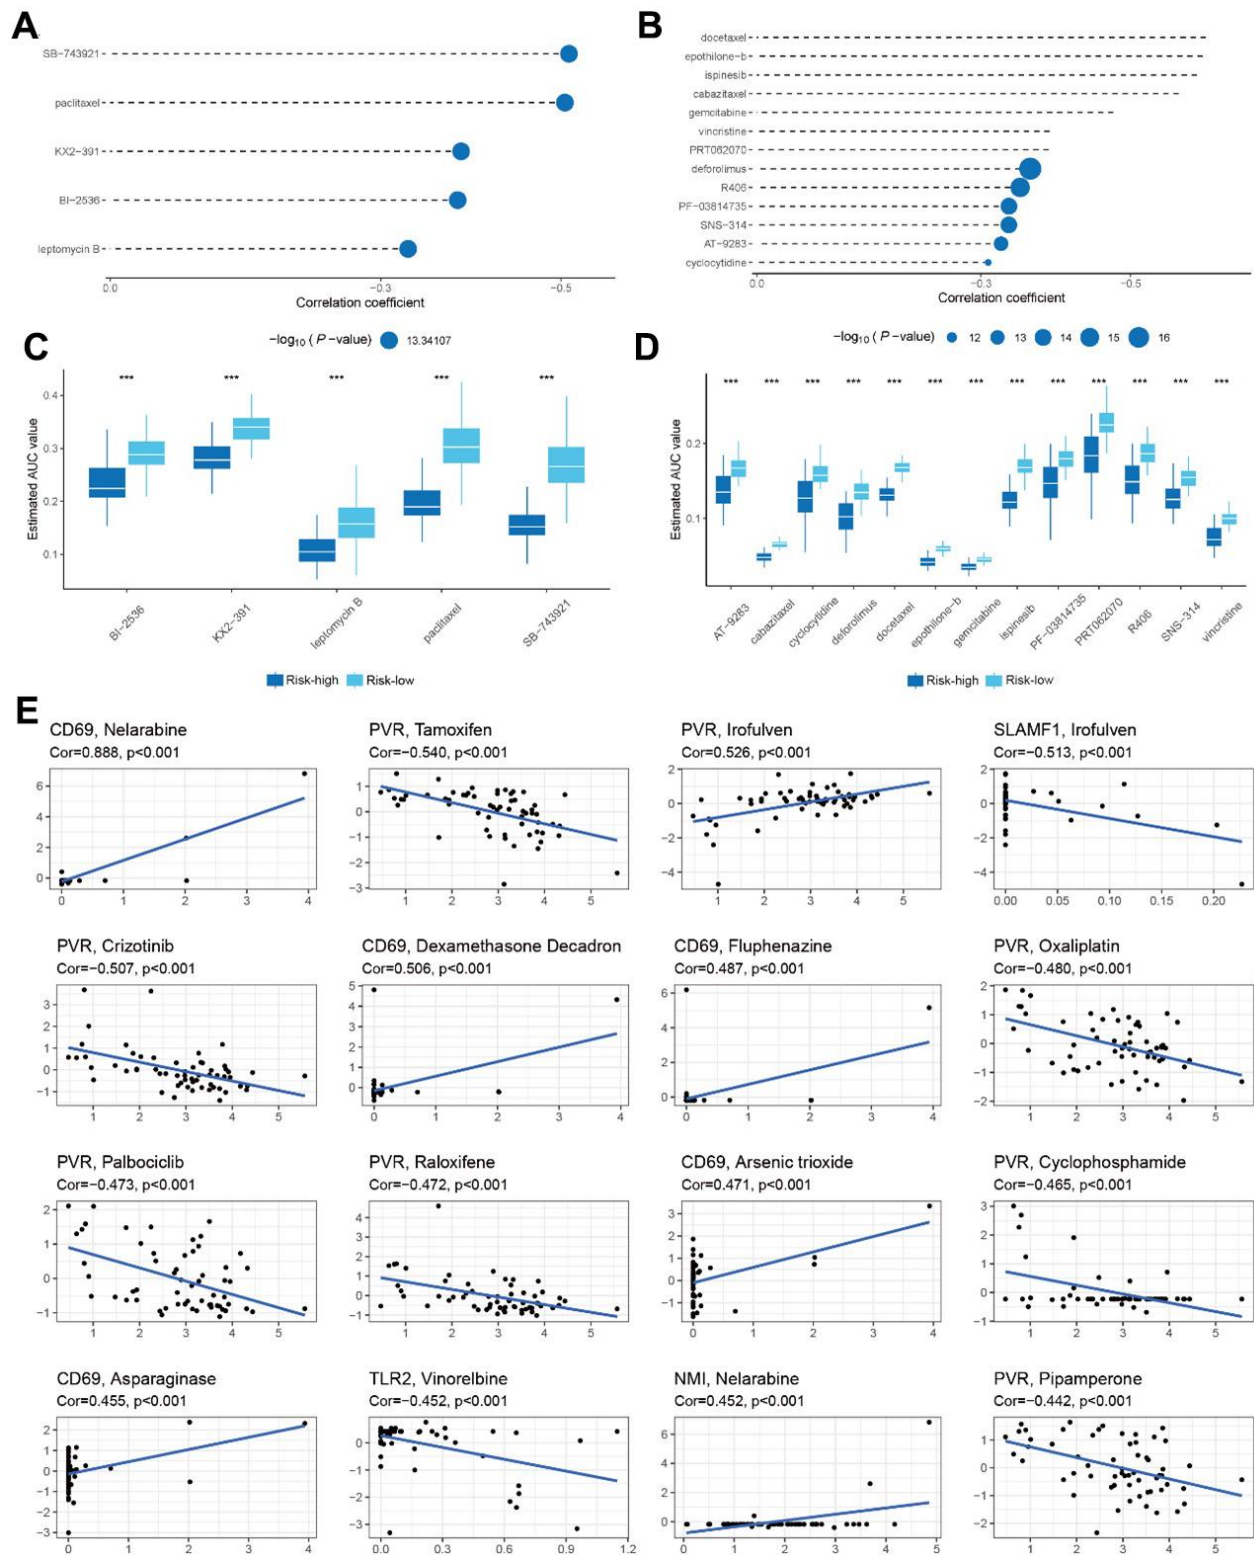

**Supplementary Figure 2. Analysis of potential therapeutic agents.** (A, B) CTRP- and PRISM-derived compounds. (C, D) Results of differential drug response analysis of CTRP- and PRISM-derived compounds; the lower values on the y-axis of boxplots imply greater drug sensitivity. (E) The correlation between hub genes and sensitivity to chemotherapy.
